# Supplementary material for: Study protocol of the HD-MED study aiming to personalize drug treatment in Huntington’s disease: a longitudinal, observational study to assess medication use and efficacy in relation to pharmacogenetics
Source: PubMed Central journal article supplement — Ther Adv Rare Dis. 2023 Nov 8;4:26330040231204643. doi: 10.1177/26330040231204643 (PMC10634258; doi:10.1177/26330040231204643), 2023-11-08

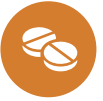

## Variant List – VeriDose® Core Panel

| Gene*                                | Current Nucleotide Change | Legacy Nucleotide Change | Amino Acid Change / Star Allele | dbSNP RS#  |
|--------------------------------------|---------------------------|--------------------------|---------------------------------|------------|
| ABCB1<br>(NG_011513.1)               | 208920T>C                 | c.3435C>T                | p.I1145=                        | rs1045642  |
| APOE<br>(NG_007084.2)                | 7903T>C                   | c.388T>C                 | p.C130R                         | rs429358   |
|                                      | 8041C>T                   | c.526C>T                 | p.R176C                         | rs7412     |
| COMT<br>(NG_011526.1;<br>LRG_1010)   | 27009G>A                  | c.472G>A                 | p.V158M                         | rs4680     |
| CYP1A2<br>(NG_061543.1;<br>LRG_1274) | 2035>A                    | g.-3860G>A               | *1C                             | rs2069514  |
|                                      | 5732>A                    | g.-163C>A                | *1F                             | rs762551   |
|                                      | 5166C>T                   | g.-729C>T                | *1K                             | rs12720461 |
|                                      | 9427G>A                   | g.3533G>A                | *7                              | rs56107638 |
| CYP2B6<br>(NG_007929.1;<br>LRG_1267) | 6452C>A                   | g.558C>A                 | *11                             | rs72547513 |
|                                      | 15631>A                   | c.516G>A                 | *6                              | rs3745274  |
| CYP2C9<br>(NG_007929.1;<br>LRG_1267) | 21011T>C                  | c.983T>C                 | *18                             | rs28399499 |
|                                      | 19154G>A                  | c.681G>A                 | *2                              | rs4244285  |
| CYP2C19<br>(NG_008384.3;<br>LRG_584) | 17948G>A                  | c.636G>A                 | *3                              | rs4986893  |
|                                      | 1A>G                      | c.1A>G                   | *4                              | rs28399504 |
|                                      | 90033C>T                  | c.1297C>T                | *5                              | rs56337013 |
|                                      | 12748G>A                  | c.395G>A                 | *6                              | rs72552267 |
|                                      | 19294T>A                  | g.19294T>A               | *7                              | rs72558186 |
|                                      | 12711T>C                  | c.358T>C                 | *8                              | rs41291556 |
|                                      | -806C>T                   | g.-806C>T                | *17                             | rs12248560 |
| CYP2C9<br>(NG_008385.2;<br>LRG_1195) | 3608C>T                   | c.430C>T                 | *2                              | rs1799853  |
|                                      | 42614A>C                  | c.1075A>C                | *3                              | rs1057910  |
|                                      | 42615T>C                  | c.1076T>C                | *4                              | rs56165452 |
|                                      | 42619C>G                  | c.1080C>G                | *5                              | rs28371686 |
|                                      | 10601delA                 | c.818delA                | *6                              | rs9332131  |
|                                      | 3627G>A                   | c.449G>A                 | *8                              | rs7900194  |
|                                      | 42542C>T                  | c.1003C>T                | *11                             | rs28371685 |
|                                      | 50338C>T                  | c.1465C>T                | *12                             | rs9332239  |
|                                      | 3276T>C                   | c.269T>C                 | *13                             | rs72558187 |
| 9100C>A                              | c.485C>A                  | *15                      | rs72558190                      |            |
| 9056_9065del                         | c.353_362del              | *25                      | rs1304490498                    |            |
| CYP2D6<br>(NG_008376.4;<br>LRG_303)  | 2851C>T                   | g.2850C>T                | *2, multiple                    | rs16947    |
|                                      | 4181G>C                   | g.4180G>C                | *2, multiple                    | rs1135840  |
|                                      | 2550delA                  | g.2549delA               | *3                              | rs35742686 |
|                                      | 1847G>A                   | g.1846G>A                | *4                              | rs3892097  |
|                                      | 1708delT                  | g.1707delT               | *6                              | rs5030655  |
| 2936A>C                              | g.2935A>C                 | *7                       | rs5030867                       |            |

\*New annotation based on current standards. If no legacy name present, there was no change.  
If LRG is present, naming starts with +1 at ATG site, else it is from start of reference sequence

## Variant List – VeriDose® Panel (PAGE 2 OF 3)

| Gene*                                | Current Nucleotide Change                                        | Legacy Nucleotide Change                                                                                                                                                                                       | Amino Acid Change / Star Allele | dbSNP RS#                    |
|--------------------------------------|------------------------------------------------------------------|----------------------------------------------------------------------------------------------------------------------------------------------------------------------------------------------------------------|---------------------------------|------------------------------|
| CYP2D6<br>(NG_008376.4;<br>LRG_303)  | 1759G>T                                                          | g.1758G>T                                                                                                                                                                                                      | *8                              | rs5030865                    |
|                                      | 2616delAAG                                                       | g.2613_2615delAGA<br>(g.2615_2617delAAG)                                                                                                                                                                       | *9                              | rs5030656                    |
|                                      | 100C>T                                                           | g.100C>T                                                                                                                                                                                                       | *10, multiple                   | rs1065852                    |
|                                      | 882G>C                                                           | c.883G>C                                                                                                                                                                                                       | *11                             | rs201377835                  |
|                                      | 124G>A                                                           | g.124G>A                                                                                                                                                                                                       | *12                             | rs5030862                    |
|                                      | 1759G>A                                                          | g.1758G>A                                                                                                                                                                                                      | *14                             | rs5030865                    |
|                                      | 137-138insT                                                      | g.137-138insT                                                                                                                                                                                                  | *15                             | rs72549357                   |
|                                      | 1022C>T                                                          | g.1023C>T                                                                                                                                                                                                      | *17                             | rs28371706                   |
|                                      | 4135_4136insTGCCCACTG                                            | c.dup4125-4133                                                                                                                                                                                                 | *18                             | dup4125_4133/<br>rs765776661 |
|                                      | 2540delAACT                                                      | c.2539_2542delAACT                                                                                                                                                                                             | *19                             | rs72549353                   |
|                                      | 1977_1978insG                                                    | c.1973_1974insG                                                                                                                                                                                                | *20                             | rs72549354                   |
|                                      | 3184G>A                                                          | g.3183G>A                                                                                                                                                                                                      | *29                             | rs59421388                   |
|                                      | 2989G>A                                                          | g.2988G>A                                                                                                                                                                                                      | *41                             | rs28371725                   |
|                                      | deletion (*5) and<br>duplication (xN)<br>(in non-hybrid samples) | In hybrid-allele containing samples might overestimate or underestimate copy number. For detailed copy number analysis, we recommend running VeriDose CYP2D6 CNV assay in addition to the VeriDose Core panel. |                                 |                              |
| CYP3A4<br>(NG_008421.1)              | 15722T>C                                                         | c.664T>C                                                                                                                                                                                                       | *2                              | rs55785340                   |
|                                      | 15624T>C                                                         | c.566 T>C                                                                                                                                                                                                      | *17                             | rs4987161                    |
|                                      | 15389C>T                                                         | g.15389C>T                                                                                                                                                                                                     | *22                             | rs35599367                   |
| CYP3A5<br>(NG_007938.2;<br>LRG_1431) | 27284C>A                                                         | g.27289C>A                                                                                                                                                                                                     | *3.010                          | rs28365083                   |
|                                      | 6981A>G                                                          | g.6986A>G                                                                                                                                                                                                      | *3                              | rs776746                     |
|                                      | 14685G>A                                                         | c.624G>A                                                                                                                                                                                                       | *6                              | rs10264272                   |
|                                      | 27126_27127insT                                                  | g.27131_27132insT                                                                                                                                                                                              | *7                              | rs41303343                   |
| DRD2<br>(NG_012976.1)                | 17316G>A                                                         | c.2137G>A                                                                                                                                                                                                      | p.E713K / Taq1A                 | rs1800497                    |
| F2<br>(NG_008953.1;<br>LRG_551)      | 25313G>A                                                         | c.*97G>A                                                                                                                                                                                                       | p.G20210A                       | rs1799963                    |
| F5<br>(NG_011806.1;<br>LRG_553)      | 41721G>A                                                         | c.1601G>A                                                                                                                                                                                                      | p.R506Q                         | rs6025                       |
| GLP1R                                | c.780A>C/T                                                       |                                                                                                                                                                                                                | p.L260F                         | rs1042044                    |
|                                      | c.502G>A/C                                                       |                                                                                                                                                                                                                | p.G168R/G168S                   | rs6923761                    |
|                                      | c.510-1135T>G                                                    |                                                                                                                                                                                                                |                                 | rs2300615                    |
| MTHFR<br>(NG_013351.1;<br>LRG_726)   | 14783C>T                                                         | c.665C>T                                                                                                                                                                                                       | p.A222V                         | rs1801133                    |
|                                      | 16685A>C                                                         | c.1286A>C                                                                                                                                                                                                      | p.E429A                         | rs1801131                    |
| OPRM1<br>(NG_021208.2;<br>LRG_1007)  | 34162A>G                                                         | c.118A>G                                                                                                                                                                                                       | p.A118G                         | rs1799971                    |
| PNPLA5                               | c.608-169G>A                                                     |                                                                                                                                                                                                                |                                 | rs5764010                    |

\*New annotation based on current standards. If no legacy name present, there was no change.  
If LRG is present, naming starts with +1 at ATG site, else it is from start of reference sequence

## Variant List – VeriDose® Panel (PAGE 3 OF 3)

| Gene*                                 | Current Nucleotide Change | Legacy Nucleotide Change | Amino Acid Change / Star Allele | dbSNP RS# |
|---------------------------------------|---------------------------|--------------------------|---------------------------------|-----------|
| SLCO1B1<br>(NG_011745.1;<br>LRG_1022) | 52422T>C                  | c.521T>C                 | p.V174A                         | rs4149056 |
| SULT4A1                               | c.743-374A>G              |                          |                                 | rs763120  |
| VKORC1<br>(NG_011564.1;<br>LRG_582)   | 3588G>A                   | c.-1639G>A               | 1639 G>A                        | rs9923231 |

\*New annotation based on current standards. If no legacy name present, there was no change.  
If LRG is present, naming starts with +1 at ATG site, else it is from start of reference sequence

Additionally, the Agena VeriDose® Core Panel will be combined with copy number variation (CNV) analysis via long-range polymerase chain reaction (PCR) to detect *CYP2D6* duplications and deletions.

For Research Use Only. Not for use in diagnostic procedures.

3

Agena Bioscience, Inc.  
4755 Eastgate Mall  
San Diego, CA 92121  
Phone: +1.877.443.6663

Order Desk: +1.858.202.9301  
Order Desk Fax: +1.858.202.9220  
orderdesk@agenabio.com  
Website: www.agenabio.com

Online Support:  
<https://support.agenabio.com>

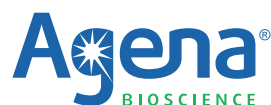

Supplement: sj-pdf-2-trd-10.1177_26330040231204643.pdf [file sj-pdf-2-trd-10.1177_26330040231204643.pdf]
